# Supplementary material
Source: Springer Nature journal article supplement (https://www.springermedizin.de/resource/supplementary/12887_2010_353_MOESM1_ESM.pdf/9474916)
Supplement: MOESM1 [file 9474916]

158 Patients screened for eligibility

- Did not have endoscopic proof of reflux esophagitis, n = 27
- Presence of eosinophilic esophagitis, n = 4
- Had normal endoscopy, n = 2
- Failed for reasons unrelated to endoscopy, n = 16

109 Randomized

53 Patients had EE

56 Patients did not have EE
